# Supplementary material
Source: publisher figshare collection journal article supplement (https://acs.figshare.com/ndownloader/files/5678238)
Supplement: Supplementary file 1 [file 5678238]

 
data_14 
 
_audit_creation_method            SHELXL-97 
_chemical_name_systematic 
; 
 ? 
; 
_chemical_name_common             Ag(Bt-BTH)1.5(ClO4)  
_chemical_melting_point           ? 
_chemical_formula_moiety          ? 
_chemical_formula_sum 
 'C21 H45 Ag Cl O4 S3' 
_chemical_formula_weight          601.07 
 
loop_ 
 _atom_type_symbol 
 _atom_type_description 
 _atom_type_scat_dispersion_real 
 _atom_type_scat_dispersion_imag 
 _atom_type_scat_source 
 'C'  'C'   0.0033   0.0016 
 'International Tables Vol C Tables 4.2.6.8 and 6.1.1.4' 
 'H'  'H'   0.0000   0.0000 
 'International Tables Vol C Tables 4.2.6.8 and 6.1.1.4' 
 'O'  'O'   0.0106   0.0060 
 'International Tables Vol C Tables 4.2.6.8 and 6.1.1.4' 
 'S'  'S'   0.1246   0.1234 
 'International Tables Vol C Tables 4.2.6.8 and 6.1.1.4' 
 'Cl'  'Cl'   0.1484   0.1585 
 'International Tables Vol C Tables 4.2.6.8 and 6.1.1.4' 
 'Ag'  'Ag'  -0.8971   1.1015 
 'International Tables Vol C Tables 4.2.6.8 and 6.1.1.4' 
 
_symmetry_cell_setting            'Monoclinic'
_symmetry_space_group_name_H-M    'P2(1)/n  '
 
loop_ 
 _symmetry_equiv_pos_as_xyz 
 'x, y, z' 
 '-x+1/2, y+1/2, -z+1/2' 
 '-x, -y, -z' 
 'x-1/2, -y-1/2, z-1/2' 
 
_cell_length_a                    10.378(2) 
_cell_length_b                    14.131(3) 
_cell_length_c                    20.043(4) 
_cell_angle_alpha                 90.00 
_cell_angle_beta                  102.37(3) 
_cell_angle_gamma                 90.00 
_cell_volume                      2871.0(10) 
_cell_formula_units_Z             4 
_cell_measurement_temperature     293(2) 
_cell_measurement_reflns_used     969
_cell_measurement_theta_min        2.53
_cell_measurement_theta_max       19.65
 
_exptl_crystal_description        
_exptl_crystal_colour             colorless
_exptl_crystal_size_max           0.30 
_exptl_crystal_size_mid           0.28 
_exptl_crystal_size_min           0.26 
_exptl_crystal_density_meas       ? 
_exptl_crystal_density_diffrn     1.391 
_exptl_crystal_density_method     'not measured' 
_exptl_crystal_F_000              1260 
_exptl_absorpt_coefficient_mu     1.036 
_exptl_absorpt_correction_type    MULTI-SCAN 
_exptl_absorpt_correction_T_min   0.7464 
_exptl_absorpt_correction_T_max   0.7745 
_exptl_absorpt_process_details    SADABS  
 
_exptl_special_details 
; 
 ? 
; 
 
_diffrn_ambient_temperature       293(2) 
_diffrn_radiation_wavelength      0.71073 
_diffrn_radiation_type            MoK\a 
_diffrn_radiation_source          'fine-focus sealed tube' 
_diffrn_radiation_monochromator   graphite 
_diffrn_measurement_device_type   'CCD area detector' 
_diffrn_measurement_method        'phi and omega scans' 
_diffrn_detector_area_resol_mean  ? 
_diffrn_standards_number          ? 
_diffrn_standards_interval_count  ? 
_diffrn_standards_interval_time   ? 
_diffrn_standards_decay_%         ? 
_diffrn_reflns_number             11736 
_diffrn_reflns_av_R_equivalents   0.0533 
_diffrn_reflns_av_sigmaI/netI     0.0698 
_diffrn_reflns_limit_h_min        -12 
_diffrn_reflns_limit_h_max        10 
_diffrn_reflns_limit_k_min        -16 
_diffrn_reflns_limit_k_max        11 
_diffrn_reflns_limit_l_min        -23 
_diffrn_reflns_limit_l_max        22 
_diffrn_reflns_theta_min          2.08 
_diffrn_reflns_theta_max          25.03 
_reflns_number_total              5058 
_reflns_number_gt                 2782 
_reflns_threshold_expression      >2sigma(I) 
 
_computing_data_collection        'Bruker SMART' 
_computing_cell_refinement        'Bruker SMART' 
_computing_data_reduction         'Bruker SAINT'
_computing_structure_solution     'SHELXS-97 (Sheldrick, 1990)' 
_computing_structure_refinement   'SHELXL-97 (Sheldrick, 1997)' 
_computing_molecular_graphics     'Bruker SHELXTL' 
_computing_publication_material   'Bruker SHELXTL'
 
_refine_special_details 
; 
 Refinement of F^2^ against ALL reflections.  The weighted R-factor wR and 
 goodness of fit S are based on F^2^, conventional R-factors R are based 
 on F, with F set to zero for negative F^2^. The threshold expression of 
 F^2^ > 2sigma(F^2^) is used only for calculating R-factors(gt) etc. and is 
 not relevant to the choice of reflections for refinement.  R-factors based 
 on F^2^ are statistically about twice as large as those based on F, and R- 
 factors based on ALL data will be even larger. 
; 
 
_refine_ls_structure_factor_coef  Fsqd  
_refine_ls_matrix_type            full 
_refine_ls_weighting_scheme       calc  
_refine_ls_weighting_details 
 'calc w=1/[\s^2^(Fo^2^)+(0.1737P)^2^+0.0000P] where P=(Fo^2^+2Fc^2^)/3' 
_atom_sites_solution_primary      direct 
_atom_sites_solution_secondary    difmap 
_atom_sites_solution_hydrogens    geom 
_refine_ls_hydrogen_treatment     mixed 
_refine_ls_extinction_method      none 
_refine_ls_extinction_coef        ? 
_refine_ls_number_reflns          5058 
_refine_ls_number_parameters      271 
_refine_ls_number_restraints      0 
_refine_ls_R_factor_all           0.1409 
_refine_ls_R_factor_gt            0.0765 
_refine_ls_wR_factor_ref          0.2737 
_refine_ls_wR_factor_gt           0.2229 
_refine_ls_goodness_of_fit_ref    1.003 
_refine_ls_restrained_S_all       1.003 
_refine_ls_shift/su_max           0.003 
_refine_ls_shift/su_mean          0.000 
 
loop_ 
 _atom_site_label 
 _atom_site_type_symbol 
 _atom_site_fract_x 
 _atom_site_fract_y 
 _atom_site_fract_z 
 _atom_site_U_iso_or_equiv 
 _atom_site_adp_type 
 _atom_site_occupancy 
 _atom_site_symmetry_multiplicity 
 _atom_site_calc_flag 
 _atom_site_refinement_flags 
 _atom_site_disorder_assembly 
 _atom_site_disorder_group 
Ag1 Ag 0.33932(7) 0.73470(5) 0.09214(4) 0.0697(4) Uani 1 1 d . . . 
S1 S 0.5203(2) 0.63682(17) 0.06428(12) 0.0645(6) Uani 1 1 d . . . 
S2 S 0.1332(3) 0.7002(2) 0.13618(14) 0.0801(8) Uani 1 1 d . . . 
S3 S 0.2358(5) 0.8644(2) 0.00737(17) 0.1199(15) Uani 1 1 d . . . 
Cl1 Cl 0.5720(3) 0.9023(2) 0.20731(16) 0.0842(8) Uani 1 1 d . . . 
O1 O 0.4804(12) 0.8495(10) 0.1673(7) 0.187(6) Uani 1 1 d . . . 
O2 O 0.6906(15) 0.8627(13) 0.2299(10) 0.251(11) Uani 1 1 d . . . 
O3 O 0.5337(15) 0.960(2) 0.2457(12) 0.326(16) Uani 1 1 d . . . 
O4 O 0.615(3) 0.959(2) 0.1689(16) 0.346(16) Uani 1 1 d . . . 
C1 C 0.619(2) 0.5970(14) 0.1984(6) 0.167(9) Uani 1 1 d . . . 
H1A H 0.6527 0.5510 0.2330 0.250 Uiso 1 1 calc R . . 
H1B H 0.5405 0.6253 0.2081 0.250 Uiso 1 1 calc R . . 
H1C H 0.6837 0.6451 0.1980 0.250 Uiso 1 1 calc R . . 
C2 C 0.4740(16) 0.4852(12) 0.1289(9) 0.149(7) Uani 1 1 d . . . 
H2A H 0.4986 0.4365 0.1626 0.223 Uiso 1 1 calc R . . 
H2B H 0.4504 0.4570 0.0844 0.223 Uiso 1 1 calc R . . 
H2C H 0.4000 0.5197 0.1381 0.223 Uiso 1 1 calc R . . 
C3 C 0.6936(14) 0.4976(12) 0.1141(7) 0.133(6) Uani 1 1 d . . . 
H3A H 0.7270 0.4531 0.1497 0.200 Uiso 1 1 calc R . . 
H3B H 0.7627 0.5404 0.1090 0.200 Uiso 1 1 calc R . . 
H3C H 0.6624 0.4644 0.0720 0.200 Uiso 1 1 calc R . . 
C4 C 0.5863(10) 0.5504(8) 0.1315(5) 0.072(3) Uani 1 1 d . . . 
C5 C 0.6566(16) 0.7177(11) 0.0679(8) 0.123(5) Uani 1 1 d . . . 
H5A H 0.6487 0.7674 0.1002 0.147 Uiso 1 1 calc R . . 
H5B H 0.7375 0.6836 0.0863 0.147 Uiso 1 1 calc R . . 
C6 C 0.669(2) 0.7572(14) 0.0118(11) 0.181(10) Uani 1 1 d . . . 
H6A H 0.5876 0.7903 -0.0074 0.218 Uiso 1 1 calc R . . 
H6B H 0.6797 0.7078 -0.0202 0.218 Uiso 1 1 calc R . . 
C7 C 0.7863(17) 0.8289(18) 0.0171(14) 0.204(12) Uani 1 1 d . . . 
H7A H 0.7987 0.8593 0.0614 0.244 Uiso 1 1 calc R . . 
H7B H 0.8652 0.7921 0.0171 0.244 Uiso 1 1 calc R . . 
C8 C 0.781(3) 0.8966(16) -0.0288(15) 0.215(12) Uani 1 1 d . . . 
H8A H 0.8152 0.8673 -0.0653 0.258 Uiso 1 1 calc R . . 
H8B H 0.8484 0.9415 -0.0075 0.258 Uiso 1 1 calc R . . 
C9 C 0.680(2) 0.951(2) -0.0612(10) 0.194(10) Uani 1 1 d . . . 
H9A H 0.5985 0.9147 -0.0687 0.233 Uiso 1 1 calc R . . 
H9B H 0.6947 0.9702 -0.1054 0.233 Uiso 1 1 calc R . . 
C10 C 0.1511(15) 0.8556(9) 0.2099(8) 0.118(5) Uani 1 1 d . . . 
H10A H 0.1559 0.8886 0.2522 0.178 Uiso 1 1 calc R . . 
H10B H 0.0746 0.8762 0.1772 0.178 Uiso 1 1 calc R . . 
H10C H 0.2289 0.8687 0.1928 0.178 Uiso 1 1 calc R . . 
C11 C 0.0148(18) 0.7312(11) 0.2446(10) 0.145(7) Uani 1 1 d . . . 
H11A H 0.0191 0.7584 0.2889 0.217 Uiso 1 1 calc R . . 
H11B H 0.0033 0.6639 0.2470 0.217 Uiso 1 1 calc R . . 
H11C H -0.0584 0.7579 0.2126 0.217 Uiso 1 1 calc R . . 
C12 C 0.256(2) 0.7155(14) 0.2720(8) 0.149(6) Uani 1 1 d . . . 
H12A H 0.2579 0.7440 0.3156 0.224 Uiso 1 1 calc R . . 
H12B H 0.3361 0.7308 0.2575 0.224 Uiso 1 1 calc R . . 
H12C H 0.2489 0.6481 0.2755 0.224 Uiso 1 1 calc R . . 
C13 C 0.1418(12) 0.7521(8) 0.2215(6) 0.083(3) Uani 1 1 d . . . 
C14 C 0.1209(13) 0.5757(9) 0.1474(7) 0.102(4) Uani 1 1 d . . . 
H14A H 0.1963 0.5538 0.1812 0.122 Uiso 1 1 calc R . . 
H14B H 0.0417 0.5616 0.1639 0.122 Uiso 1 1 calc R . . 
C15 C 0.1164(15) 0.5259(12) 0.0819(8) 0.133(6) Uani 1 1 d . . . 
H15A H 0.1873 0.5506 0.0623 0.160 Uiso 1 1 calc R . . 
H15B H 0.1356 0.4596 0.0922 0.160 Uiso 1 1 calc R . . 
C16 C -0.0027(15) 0.5305(12) 0.0304(9) 0.139(7) Uani 1 1 d . . . 
H16A H -0.0183 0.5956 0.0154 0.167 Uiso 1 1 calc R . . 
H16B H -0.0762 0.5105 0.0498 0.167 Uiso 1 1 calc R . . 
C17 C 0.3379(14) 0.937(2) 0.0073(9) 0.218(14) Uani 1 1 d . . . 
H17A H 0.3343 0.9569 -0.0395 0.262 Uiso 1 1 calc R . . 
H17B H 0.4239 0.9095 0.0246 0.262 Uiso 1 1 calc R . . 
C18 C 0.1905(11) 0.8185(10) -0.0793(5) 0.084(3) Uani 1 1 d . . . 
C19 C 0.1107(13) 0.8925(11) -0.1244(7) 0.114(5) Uani 1 1 d . . . 
H19A H 0.0845 0.8684 -0.1701 0.170 Uiso 1 1 calc R . . 
H19B H 0.1631 0.9484 -0.1246 0.170 Uiso 1 1 calc R . . 
H19C H 0.0336 0.9077 -0.1073 0.170 Uiso 1 1 calc R . . 
C20 C 0.1104(14) 0.7344(9) -0.0734(8) 0.108(4) Uani 1 1 d . . . 
H20A H 0.0816 0.7060 -0.1176 0.162 Uiso 1 1 calc R . . 
H20B H 0.0349 0.7526 -0.0558 0.162 Uiso 1 1 calc R . . 
H20C H 0.1623 0.6897 -0.0429 0.162 Uiso 1 1 calc R . . 
C21 C 0.3084(13) 0.7918(11) -0.1062(7) 0.109(4) Uani 1 1 d . . . 
H21A H 0.2807 0.7670 -0.1516 0.163 Uiso 1 1 calc R . . 
H21B H 0.3581 0.7446 -0.0772 0.163 Uiso 1 1 calc R . . 
H21C H 0.3625 0.8467 -0.1072 0.163 Uiso 1 1 calc R . . 
 
loop_ 
 _atom_site_aniso_label 
 _atom_site_aniso_U_11 
 _atom_site_aniso_U_22 
 _atom_site_aniso_U_33 
 _atom_site_aniso_U_23 
 _atom_site_aniso_U_13 
 _atom_site_aniso_U_12 
Ag1 0.0747(6) 0.0705(5) 0.0621(5) 0.0053(3) 0.0108(4) 0.0071(3) 
S1 0.0727(15) 0.0737(15) 0.0480(13) 0.0002(11) 0.0149(11) 0.0018(11) 
S2 0.0765(17) 0.096(2) 0.0688(18) -0.0040(14) 0.0171(13) -0.0031(14) 
S3 0.194(4) 0.087(2) 0.064(2) 0.0038(16) -0.004(2) 0.051(2) 
Cl1 0.0895(19) 0.0762(17) 0.0792(19) -0.0178(14) 0.0011(15) -0.0144(14) 
O1 0.153(9) 0.191(12) 0.211(13) -0.128(11) 0.025(8) -0.065(9) 
O2 0.159(12) 0.240(18) 0.29(2) -0.126(16) -0.087(13) 0.085(11) 
O3 0.153(12) 0.48(3) 0.32(2) -0.30(3) -0.003(14) 0.034(16) 
O4 0.31(3) 0.34(3) 0.41(4) 0.12(3) 0.11(3) -0.13(2) 
C1 0.25(2) 0.195(17) 0.041(7) -0.015(8) 0.007(10) 0.101(15) 
C2 0.161(14) 0.135(13) 0.165(16) 0.087(12) 0.067(12) 0.035(11) 
C3 0.125(11) 0.182(15) 0.089(10) -0.005(9) 0.015(8) 0.078(11) 
C4 0.073(6) 0.089(7) 0.056(6) 0.010(5) 0.019(5) 0.028(5) 
C5 0.139(12) 0.124(11) 0.126(13) -0.027(9) 0.078(10) -0.055(9) 
C6 0.181(19) 0.20(2) 0.148(18) 0.069(14) -0.001(15) -0.094(15) 
C7 0.108(12) 0.21(2) 0.29(3) 0.14(2) 0.040(15) -0.013(13) 
C8 0.25(3) 0.143(18) 0.24(3) 0.017(18) 0.03(2) 0.094(18) 
C9 0.178(19) 0.30(3) 0.104(14) -0.022(17) 0.020(12) 0.082(19) 
C10 0.155(12) 0.074(8) 0.150(13) -0.014(8) 0.084(11) -0.004(8) 
C11 0.158(15) 0.132(12) 0.180(18) -0.033(11) 0.118(14) -0.022(10) 
C12 0.176(16) 0.179(17) 0.084(11) 0.002(10) 0.008(11) -0.023(13) 
C13 0.085(7) 0.098(9) 0.073(7) -0.006(6) 0.036(6) -0.015(6) 
C14 0.117(9) 0.093(9) 0.103(10) -0.023(7) 0.041(8) -0.043(7) 
C15 0.111(11) 0.180(16) 0.124(12) -0.068(11) 0.058(10) -0.065(10) 
C16 0.128(12) 0.165(14) 0.149(15) -0.085(11) 0.084(11) -0.075(10) 
C17 0.070(9) 0.48(4) 0.115(15) 0.10(2) 0.041(9) 0.077(16) 
C18 0.084(7) 0.122(10) 0.044(6) 0.008(5) 0.011(5) 0.015(7) 
C19 0.095(8) 0.164(13) 0.077(9) 0.021(8) 0.009(7) 0.029(8) 
C20 0.100(9) 0.121(11) 0.104(10) -0.015(8) 0.025(8) -0.023(8) 
C21 0.099(9) 0.140(12) 0.089(10) -0.026(8) 0.024(7) -0.008(8) 
 
_geom_special_details 
; 
 All esds (except the esd in the dihedral angle between two l.s. planes) 
 are estimated using the full covariance matrix.  The cell esds are taken 
 into account individually in the estimation of esds in distances, angles 
 and torsion angles; correlations between esds in cell parameters are only 
 used when they are defined by crystal symmetry.  An approximate (isotropic) 
 treatment of cell esds is used for estimating esds involving l.s. planes. 
; 
 
loop_ 
 _geom_bond_atom_site_label_1 
 _geom_bond_atom_site_label_2 
 _geom_bond_distance 
 _geom_bond_site_symmetry_2 
 _geom_bond_publ_flag 
Ag1 O1 2.470(9) . ? 
Ag1 S1 2.490(3) . ? 
Ag1 S2 2.530(3) . ? 
Ag1 S3 2.573(3) . ? 
S1 C5 1.807(13) . ? 
S1 C4 1.838(10) . ? 
S2 C14 1.781(13) . ? 
S2 C13 1.845(12) . ? 
S3 C17 1.48(3) . ? 
S3 C18 1.819(11) . ? 
Cl1 O3 1.245(14) . ? 
Cl1 O4 1.26(2) . ? 
Cl1 O1 1.333(10) . ? 
Cl1 O2 1.339(12) . ? 
C1 C4 1.467(17) . ? 
C1 H1A 0.9600 . ? 
C1 H1B 0.9600 . ? 
C1 H1C 0.9600 . ? 
C2 C4 1.478(18) . ? 
C2 H2A 0.9600 . ? 
C2 H2B 0.9600 . ? 
C2 H2C 0.9600 . ? 
C3 C4 1.444(15) . ? 
C3 H3A 0.9600 . ? 
C3 H3B 0.9600 . ? 
C3 H3C 0.9600 . ? 
C5 C6 1.29(2) . ? 
C5 H5A 0.9700 . ? 
C5 H5B 0.9700 . ? 
C6 C7 1.57(2) . ? 
C6 H6A 0.9700 . ? 
C6 H6B 0.9700 . ? 
C7 C8 1.32(3) . ? 
C7 H7A 0.9700 . ? 
C7 H7B 0.9700 . ? 
C8 C9 1.36(3) . ? 
C8 H8A 0.9700 . ? 
C8 H8B 0.9700 . ? 
C9 C17 1.94(3) 3_675 ? 
C9 H9A 0.9700 . ? 
C9 H9B 0.9700 . ? 
C10 C13 1.486(15) . ? 
C10 H10A 0.9600 . ? 
C10 H10B 0.9600 . ? 
C10 H10C 0.9600 . ? 
C11 C13 1.517(18) . ? 
C11 H11A 0.9600 . ? 
C11 H11B 0.9600 . ? 
C11 H11C 0.9600 . ? 
C12 C13 1.48(2) . ? 
C12 H12A 0.9600 . ? 
C12 H12B 0.9600 . ? 
C12 H12C 0.9600 . ? 
C14 C15 1.482(17) . ? 
C14 H14A 0.9700 . ? 
C14 H14B 0.9700 . ? 
C15 C16 1.43(2) . ? 
C15 H15A 0.9700 . ? 
C15 H15B 0.9700 . ? 
C16 C16 1.50(2) 3_565 ? 
C16 H16A 0.9700 . ? 
C16 H16B 0.9700 . ? 
C17 C9 1.94(3) 3_675 ? 
C17 H17A 0.9700 . ? 
C17 H17B 0.9700 . ? 
C18 C20 1.469(17) . ? 
C18 C21 1.488(16) . ? 
C18 C19 1.508(17) . ? 
C19 H19A 0.9600 . ? 
C19 H19B 0.9600 . ? 
C19 H19C 0.9600 . ? 
C20 H20A 0.9600 . ? 
C20 H20B 0.9600 . ? 
C20 H20C 0.9600 . ? 
C21 H21A 0.9600 . ? 
C21 H21B 0.9600 . ? 
C21 H21C 0.9600 . ? 
 
loop_ 
 _geom_angle_atom_site_label_1 
 _geom_angle_atom_site_label_2 
 _geom_angle_atom_site_label_3 
 _geom_angle 
 _geom_angle_site_symmetry_1 
 _geom_angle_site_symmetry_3 
 _geom_angle_publ_flag 
O1 Ag1 S1 97.2(3) . . ? 
O1 Ag1 S2 110.4(3) . . ? 
S1 Ag1 S2 134.90(9) . . ? 
O1 Ag1 S3 92.5(4) . . ? 
S1 Ag1 S3 118.42(12) . . ? 
S2 Ag1 S3 95.90(15) . . ? 
C5 S1 C4 103.0(7) . . ? 
C5 S1 Ag1 105.1(5) . . ? 
C4 S1 Ag1 112.6(3) . . ? 
C14 S2 C13 105.4(6) . . ? 
C14 S2 Ag1 108.8(4) . . ? 
C13 S2 Ag1 111.7(4) . . ? 
C17 S3 C18 106.6(9) . . ? 
C17 S3 Ag1 107.5(7) . . ? 
C18 S3 Ag1 111.3(4) . . ? 
O3 Cl1 O4 99(2) . . ? 
O3 Cl1 O1 117.3(10) . . ? 
O4 Cl1 O1 107.0(16) . . ? 
O3 Cl1 O2 117.2(11) . . ? 
O4 Cl1 O2 92.9(17) . . ? 
O1 Cl1 O2 117.0(9) . . ? 
Cl1 O1 Ag1 171.0(9) . . ? 
C4 C1 H1A 109.5 . . ? 
C4 C1 H1B 109.5 . . ? 
H1A C1 H1B 109.5 . . ? 
C4 C1 H1C 109.5 . . ? 
H1A C1 H1C 109.5 . . ? 
H1B C1 H1C 109.5 . . ? 
C4 C2 H2A 109.5 . . ? 
C4 C2 H2B 109.5 . . ? 
H2A C2 H2B 109.5 . . ? 
C4 C2 H2C 109.5 . . ? 
H2A C2 H2C 109.5 . . ? 
H2B C2 H2C 109.5 . . ? 
C4 C3 H3A 109.5 . . ? 
C4 C3 H3B 109.5 . . ? 
H3A C3 H3B 109.5 . . ? 
C4 C3 H3C 109.5 . . ? 
H3A C3 H3C 109.5 . . ? 
H3B C3 H3C 109.5 . . ? 
C3 C4 C1 114.6(11) . . ? 
C3 C4 C2 108.2(12) . . ? 
C1 C4 C2 109.6(13) . . ? 
C3 C4 S1 110.6(9) . . ? 
C1 C4 S1 110.4(9) . . ? 
C2 C4 S1 102.8(8) . . ? 
C6 C5 S1 117.6(14) . . ? 
C6 C5 H5A 107.9 . . ? 
S1 C5 H5A 107.9 . . ? 
C6 C5 H5B 107.9 . . ? 
S1 C5 H5B 107.9 . . ? 
H5A C5 H5B 107.2 . . ? 
C5 C6 C7 116.3(19) . . ? 
C5 C6 H6A 108.2 . . ? 
C7 C6 H6A 108.2 . . ? 
C5 C6 H6B 108.2 . . ? 
C7 C6 H6B 108.2 . . ? 
H6A C6 H6B 107.4 . . ? 
C8 C7 C6 120(2) . . ? 
C8 C7 H7A 107.2 . . ? 
C6 C7 H7A 107.2 . . ? 
C8 C7 H7B 107.2 . . ? 
C6 C7 H7B 107.2 . . ? 
H7A C7 H7B 106.8 . . ? 
C7 C8 C9 131(3) . . ? 
C7 C8 H8A 104.5 . . ? 
C9 C8 H8A 104.5 . . ? 
C7 C8 H8B 104.5 . . ? 
C9 C8 H8B 104.5 . . ? 
H8A C8 H8B 105.7 . . ? 
C8 C9 C17 110.5(17) . 3_675 ? 
C8 C9 H9A 109.6 . . ? 
C17 C9 H9A 109.6 3_675 . ? 
C8 C9 H9B 109.6 . . ? 
C17 C9 H9B 109.6 3_675 . ? 
H9A C9 H9B 108.1 . . ? 
C13 C10 H10A 109.5 . . ? 
C13 C10 H10B 109.5 . . ? 
H10A C10 H10B 109.5 . . ? 
C13 C10 H10C 109.5 . . ? 
H10A C10 H10C 109.5 . . ? 
H10B C10 H10C 109.5 . . ? 
C13 C11 H11A 109.5 . . ? 
C13 C11 H11B 109.5 . . ? 
H11A C11 H11B 109.5 . . ? 
C13 C11 H11C 109.5 . . ? 
H11A C11 H11C 109.5 . . ? 
H11B C11 H11C 109.5 . . ? 
C13 C12 H12A 109.5 . . ? 
C13 C12 H12B 109.5 . . ? 
H12A C12 H12B 109.5 . . ? 
C13 C12 H12C 109.5 . . ? 
H12A C12 H12C 109.5 . . ? 
H12B C12 H12C 109.5 . . ? 
C12 C13 C10 112.4(12) . . ? 
C12 C13 C11 110.2(13) . . ? 
C10 C13 C11 109.2(11) . . ? 
C12 C13 S2 111.6(10) . . ? 
C10 C13 S2 103.8(9) . . ? 
C11 C13 S2 109.5(10) . . ? 
C15 C14 S2 110.3(11) . . ? 
C15 C14 H14A 109.6 . . ? 
S2 C14 H14A 109.6 . . ? 
C15 C14 H14B 109.6 . . ? 
S2 C14 H14B 109.6 . . ? 
H14A C14 H14B 108.1 . . ? 
C16 C15 C14 118.4(13) . . ? 
C16 C15 H15A 107.7 . . ? 
C14 C15 H15A 107.7 . . ? 
C16 C15 H15B 107.7 . . ? 
C14 C15 H15B 107.7 . . ? 
H15A C15 H15B 107.1 . . ? 
C15 C16 C16 112.4(18) . 3_565 ? 
C15 C16 H16A 109.1 . . ? 
C16 C16 H16A 109.1 3_565 . ? 
C15 C16 H16B 109.1 . . ? 
C16 C16 H16B 109.1 3_565 . ? 
H16A C16 H16B 107.9 . . ? 
S3 C17 C9 114.4(11) . 3_675 ? 
S3 C17 H17A 108.7 . . ? 
C9 C17 H17A 108.7 3_675 . ? 
S3 C17 H17B 108.7 . . ? 
C9 C17 H17B 108.7 3_675 . ? 
H17A C17 H17B 107.6 . . ? 
C20 C18 C21 110.4(11) . . ? 
C20 C18 C19 111.2(11) . . ? 
C21 C18 C19 110.3(10) . . ? 
C20 C18 S3 104.2(8) . . ? 
C21 C18 S3 111.8(8) . . ? 
C19 C18 S3 108.8(10) . . ? 
C18 C19 H19A 109.5 . . ? 
C18 C19 H19B 109.5 . . ? 
H19A C19 H19B 109.5 . . ? 
C18 C19 H19C 109.5 . . ? 
H19A C19 H19C 109.5 . . ? 
H19B C19 H19C 109.5 . . ? 
C18 C20 H20A 109.5 . . ? 
C18 C20 H20B 109.5 . . ? 
H20A C20 H20B 109.5 . . ? 
C18 C20 H20C 109.5 . . ? 
H20A C20 H20C 109.5 . . ? 
H20B C20 H20C 109.5 . . ? 
C18 C21 H21A 109.5 . . ? 
C18 C21 H21B 109.5 . . ? 
H21A C21 H21B 109.5 . . ? 
C18 C21 H21C 109.5 . . ? 
H21A C21 H21C 109.5 . . ? 
H21B C21 H21C 109.5 . . ? 
 
_diffrn_measured_fraction_theta_max    0.996 
_diffrn_reflns_theta_full              25.03 
_diffrn_measured_fraction_theta_full   0.996 
_refine_diff_density_max    1.435 
_refine_diff_density_min   -1.129 
_refine_diff_density_rms    0.109 
